# Supplementary material for: Noncovalent assembly of reduced graphene oxide and alkyl-grafted mesoporous silica: an effective drug carrier for near-infrared light-responsive controlled drug release
Source: Royal Society of Chemistry journal article supplement (doi:10.1039/c5tb00581g), 2015-01-01
Supplement: c5tb00581g1.pdf [file c5tb00581g1.pdf]

## Supporting Information

### **Noncovalent assembly of reduced graphene oxide and alkyl-grafted mesoporous silica: an effective drug carrier for near-infrared light-responsive controlled drug release**

Dinggeng He,<sup>†</sup> Xuecai Li,<sup>†</sup> Xiaoxiao He,<sup>\*</sup> Kemin Wang,<sup>\*</sup> Jinlu Tang, Xiaoxiao  
Yang, Xing He, Xue Yang and Zhen Zou

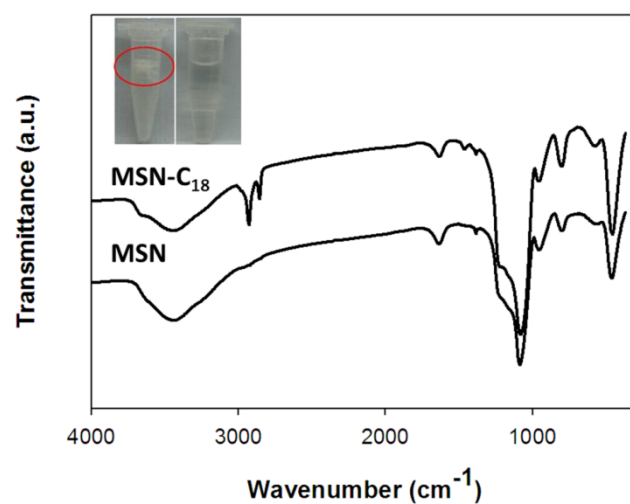

**Fig. S1** FTIR spectra of the synthesized MSN-C<sub>18</sub> and MSN. Inset: photo of MSN-C<sub>18</sub> (left) and MSN (right) solutions. The red circle illustrates the hydrophobicity of MSN-C<sub>18</sub>.

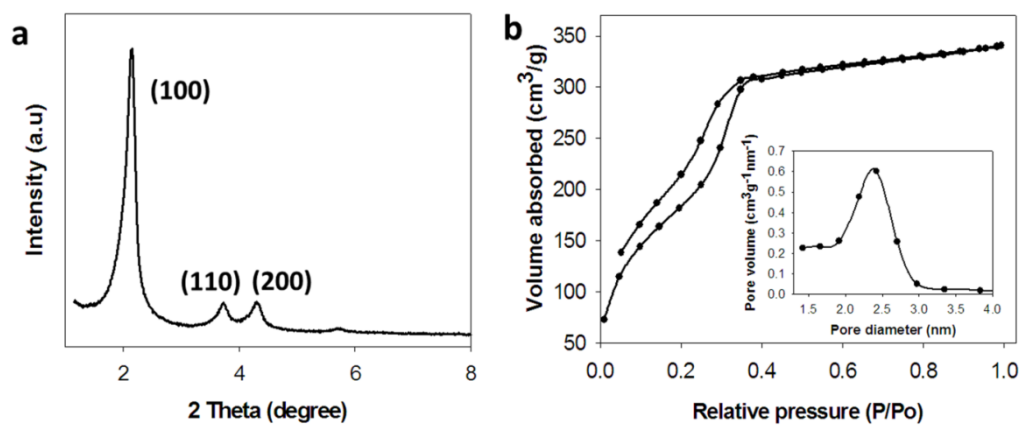

**Fig. S2** a) Powder XRD pattern of MSN-C<sub>18</sub>. b) BET nitrogen adsorption-desorption isotherm of MSN-C<sub>18</sub>. Inset: BJH pore size distribution of MSN-C<sub>18</sub>.

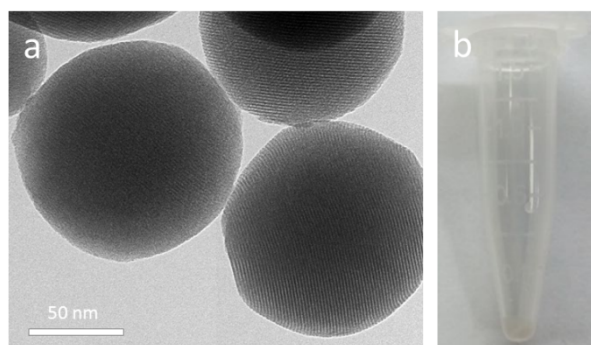

**Fig. S3** a) TEM image of MSN nanoparticles after being treated with RGO sheets. b) photo of MSN nanoparticles treated with RGO sheets. A white precipitate was observed in the bottom of centrifuge tube, further indicating that RGO sheets did not exist in the MSN surface.

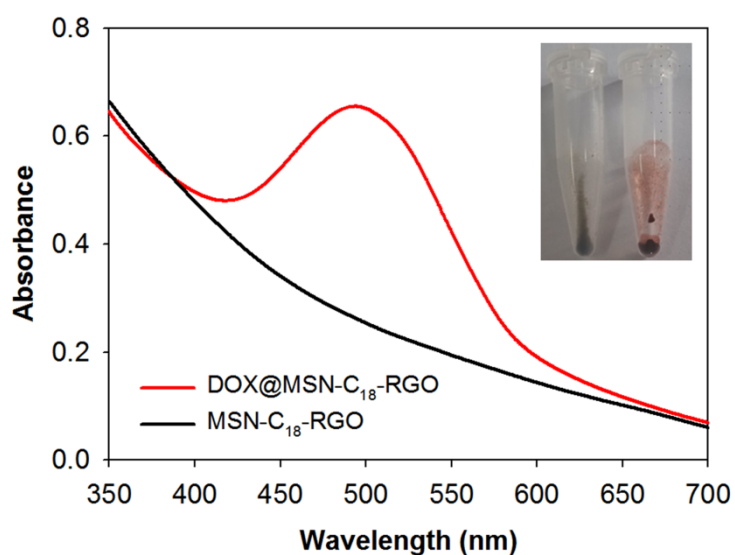

**Fig. S4** UV-vis spectra of MSN-C<sub>18</sub>-RGO and DOX@MSN-C<sub>18</sub>-RGO in aqueous solution (1.0 mg mL<sup>-1</sup>). Inset: photo of MSN-C<sub>18</sub>-RGO (left) and DOX@MSN-C<sub>18</sub>-RGO (right) nanoparticles.

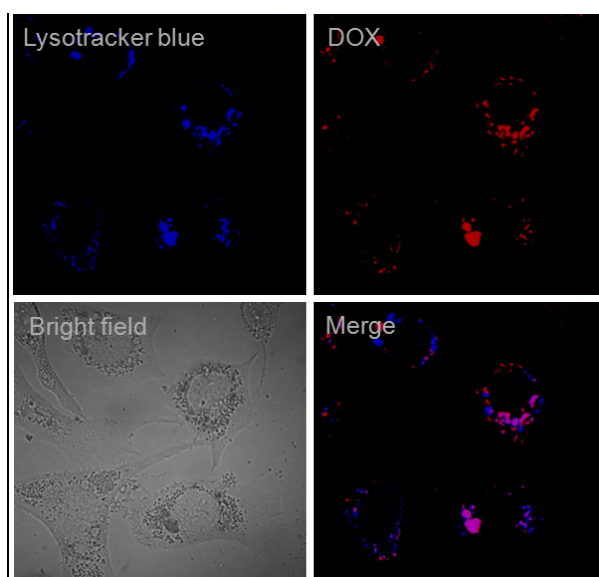

**Fig. S5** CLSM images of SMMC-7721 cells after being incubated with DOX@MSN-C<sub>18</sub>-RGO for 1 h. Lysotracker Blue (blue fluorescence) was used to stain the lysosomes. Cells were imaged using a 100× oil-immersion objective.

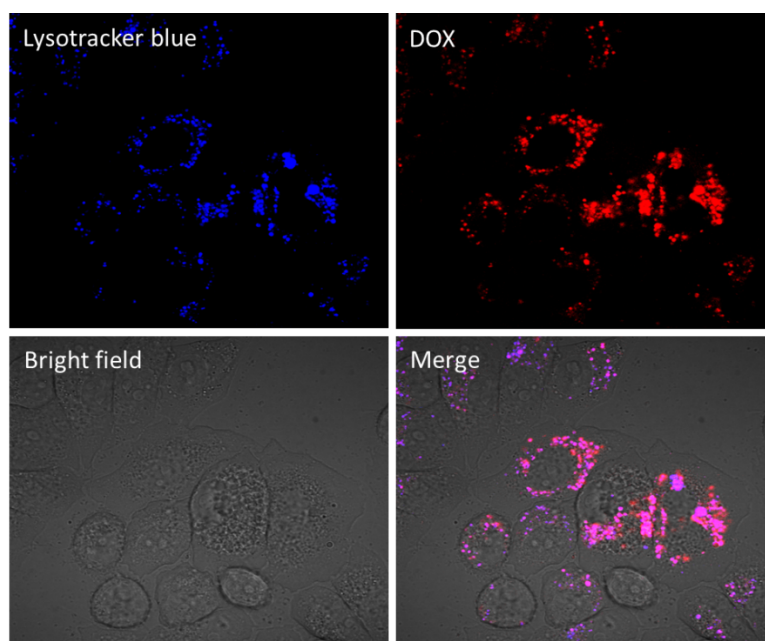

**Fig. S6** CLSM images of SMMC-7721 cells after being treated with DOX@MSN-C<sub>18</sub>-RGO for 8 h in the absence of NIR light irradiation. Lysotracker Blue (blue fluorescence) was used to stain the lysosomes. Cells were imaged using a 100× oil-immersion objective.

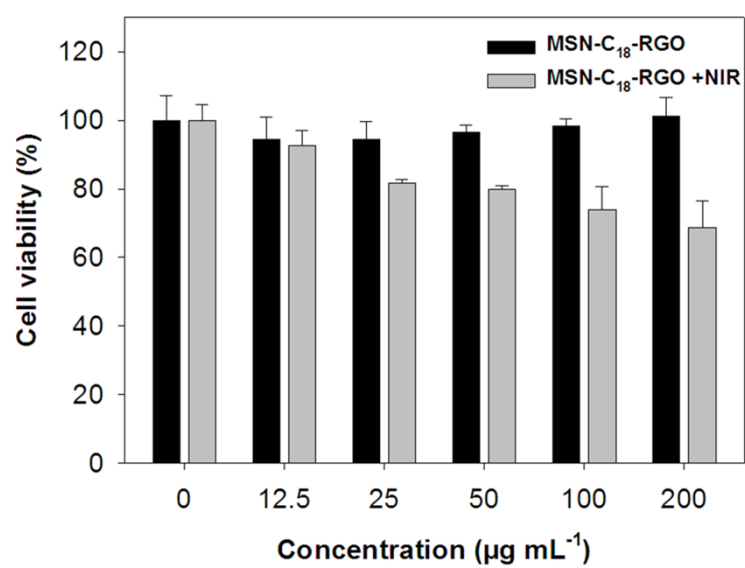

**Fig. S7** Viability of SMMC-7721 cells incubated with various MSN-C<sub>18</sub>-RGO (0-200 µg mL<sup>-1</sup>) concentrations with and without NIR light irradiation.
